# Supplementary material for: A defined heat pretreatment of gelatin enables control of hydrolytic stability, stiffness, and microstructural architecture of fibrin–gelatin hydrogel blends
Source: Royal Society of Chemistry journal article supplement (doi:10.1039/d2bm00214k), 2022-01-01
Supplement: d2bm00214k1.pdf [file d2bm00214k1.pdf]

Supplementary information for:

# A defined heat pretreatment of gelatin enables control of hydrolytic stability, stiffness, and microstructural architecture of fibrin-gelatin hydrogel blends

Mattis Wachendörfer<sup>1</sup>, Philipp Schröder<sup>1</sup>, Eva Miriam Buhl<sup>2</sup>, Alena L. Palkowitz<sup>1</sup>, Ghazi Ben Messaoud<sup>3,4</sup>, Walter Richtering<sup>3,4</sup> and Horst Fischer<sup>1\*</sup>

<sup>1</sup> Department of Dental Materials and Biomaterials Research, RWTH Aachen University Hospital, Pauwelsstrasse 30, 52074 Aachen, Germany

<sup>2</sup> Electron Microscopy Facility, Institute of Pathology, RWTH Aachen University Hospital, Pauwelsstrasse 30, 52074 Aachen, Germany

<sup>3</sup> Institute of Physical Chemistry, RWTH Aachen University, Landoltweg 2, 52074 Aachen, Germany

<sup>4</sup> DWI–Leibniz Institute for Interactive Materials, Forckenbeckstr. 50, 52074 Aachen, Germany

\* Corresponding author. E-mail address: hfischer@ukaachen.de

Table S1: Mixing protocols for 1 ml of the hydrogel blends

| 2.5, 5, 7.5, 10%Gelatin 1%Fibrin – all reagents and mixing at 37 °C |                  |               |         |         |         |         |
|---------------------------------------------------------------------|------------------|---------------|---------|---------|---------|---------|
|                                                                     | Substance        | Concentration | [ml]    |         |         |         |
| 1                                                                   | PBS              |               | 0.52175 | 0.35515 | 0.18845 | 0.02175 |
| 2                                                                   | CaCl2            | 250 mM        | 0.01    |         |         |         |
| 3                                                                   | Transglutaminase | 60 mg/ml      | 0.0667  |         |         |         |
| 4                                                                   | Gelatin          | 150mg/ml      | 0.1667  | 0.3333  | 0.5     | 0.6667  |
| 5                                                                   | Fibrinogen       | 50 mg/ml      | 0.2     |         |         |         |
| 6                                                                   | Tranexamic acid  | 100 mg/ml     | 0.0015  |         |         |         |
| Adjusting pH to 7.4 using 0.7 M NaOH and pre-incubation for 1h      |                  |               |         |         |         |         |
| 7                                                                   | Thrombin         | 30 U/ml       | 0.03335 |         |         |         |

Figure S1: Absorbance at 370 nm of fibrin-gelatin and fibrin-collagen blends. Measurements of absorbance at 450, 550 or 620 nm revealed identical patterns. A: Fibrin-gelatin blends with gelatin

processed for 2 h at 90 °C. B: Fibrin-gelatin blends with gelatin processed for 12 h at 90 °C.

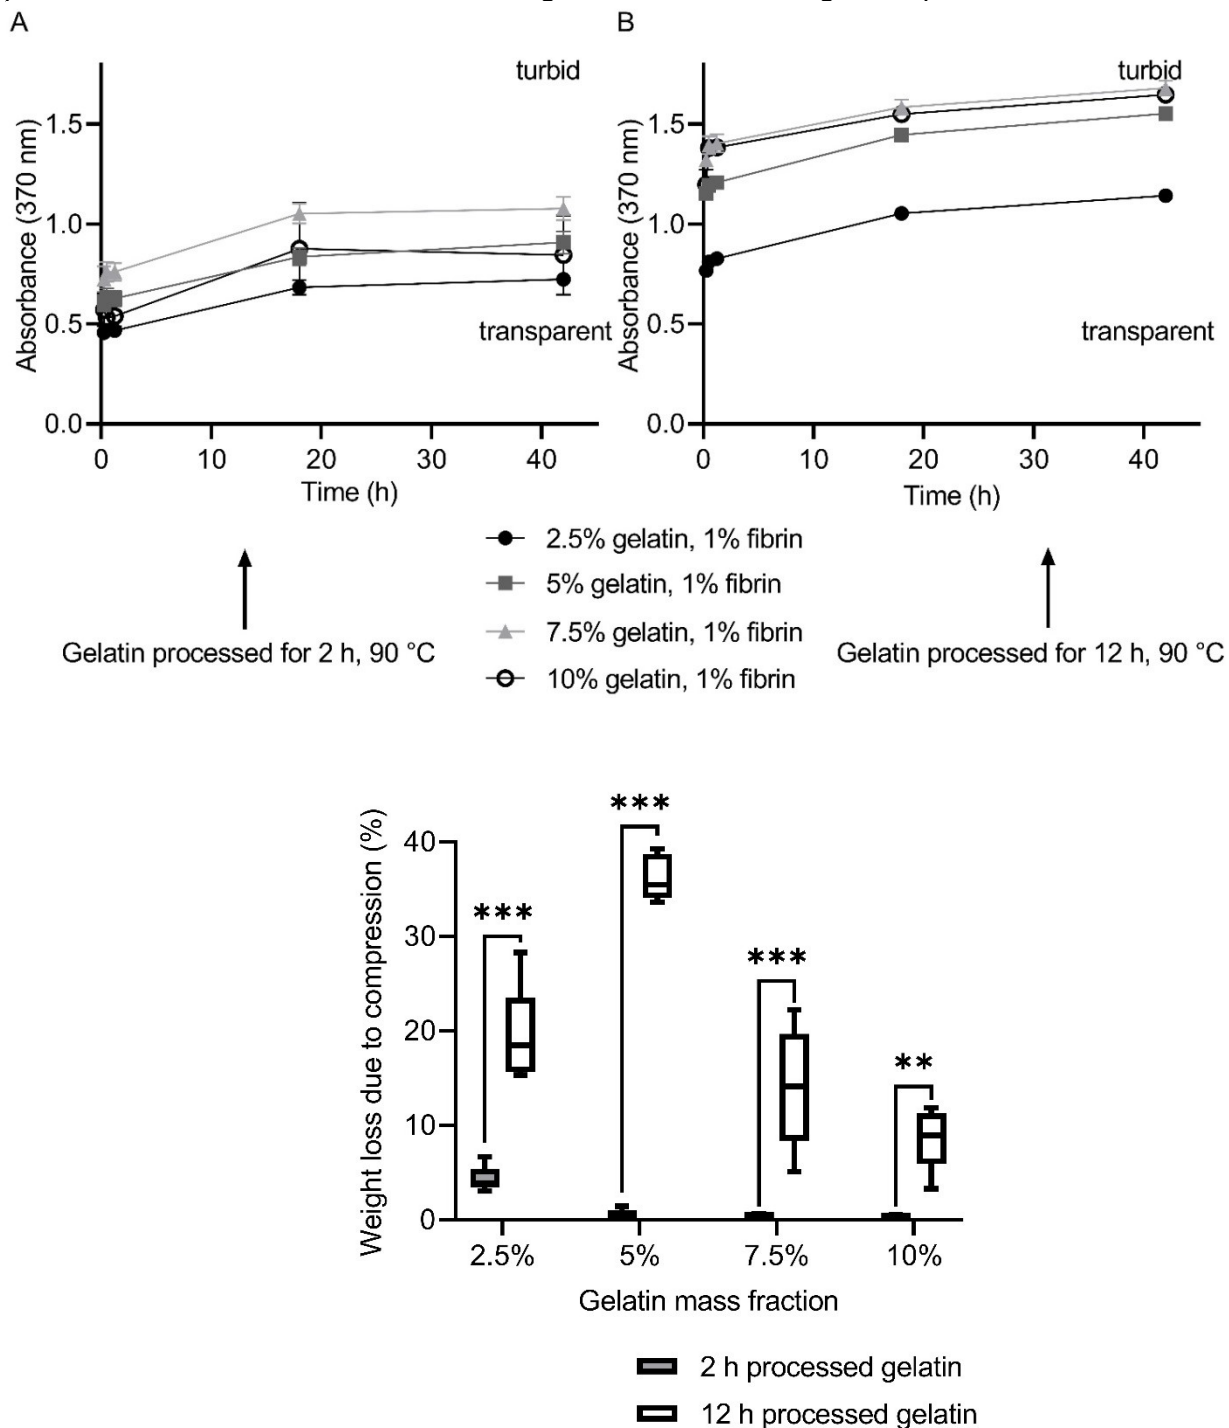

**Figure S2: Weight/fluid loss due to compression of fibrin-gelatin blends.** When gelatin in fibrin-gelatin blends was processed for 12 h instead of 2 h at 90 °C, weight loss significantly increased.

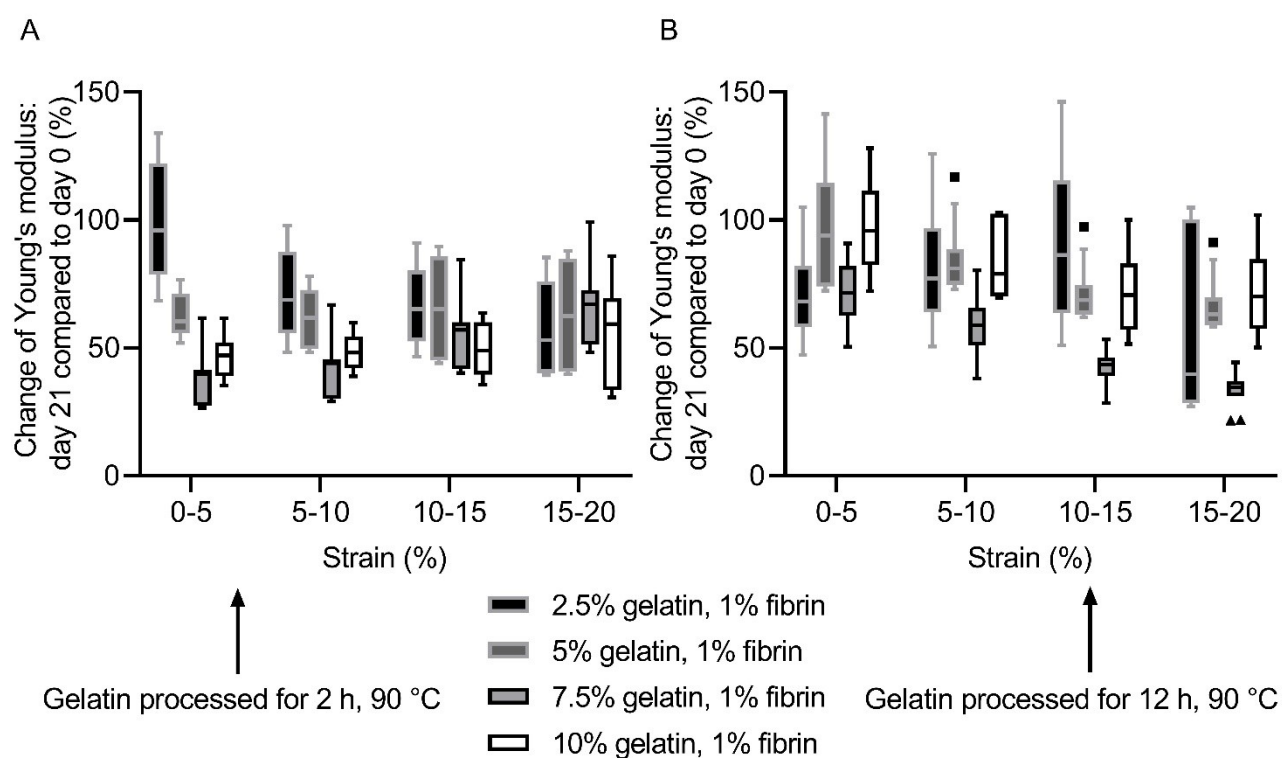

*Figure S3: Change of Young's modulus of fibrin-gelatin blends after 21 days of in vitro degradation compared to initial Young's moduli. The blends retained most of their initial stiffness. A: Fibrin-gelatin blends with gelatin processed for 2 h at 90 °C. B: Fibrin-gelatin blends with gelatin processed for 12 h at 90 °C.*

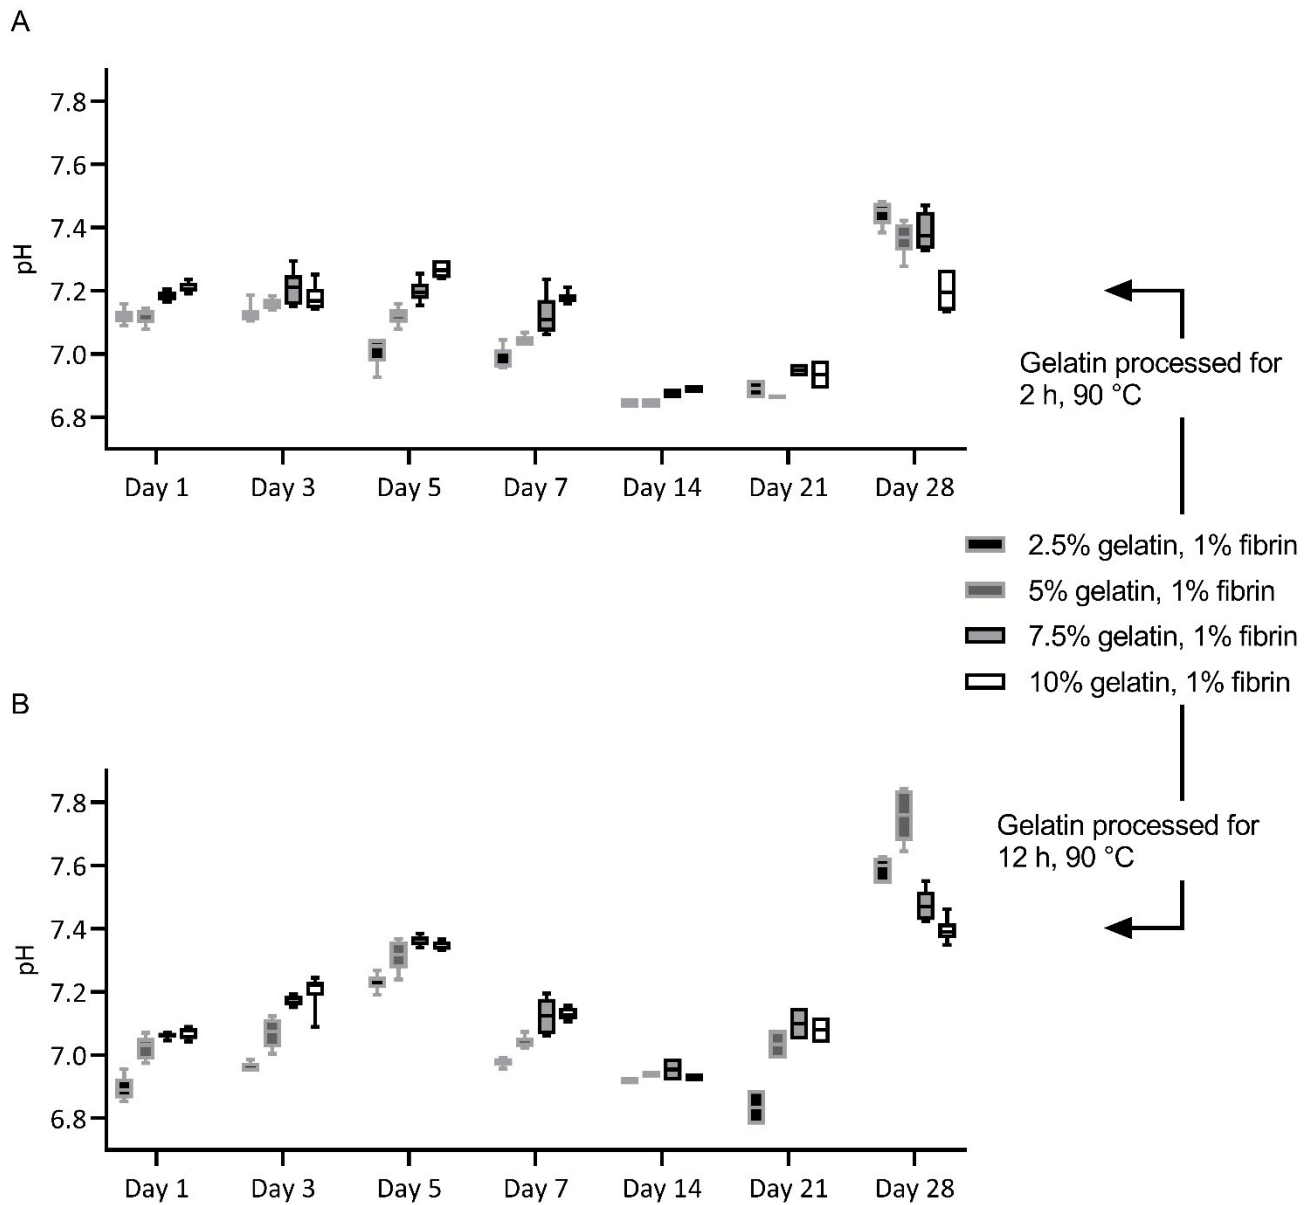

*Figure S4: pH value of PBS buffer used for in vitro degradation experiments for fibrin-gelatin blends. The shift to higher pH of day 28 indicated progressed degradation. A: Fibrin-gelatin blends with gelatin processed for 2 h at 90 °C. B: Fibrin-gelatin blends with gelatin processed for 12 h at 90 °C.*

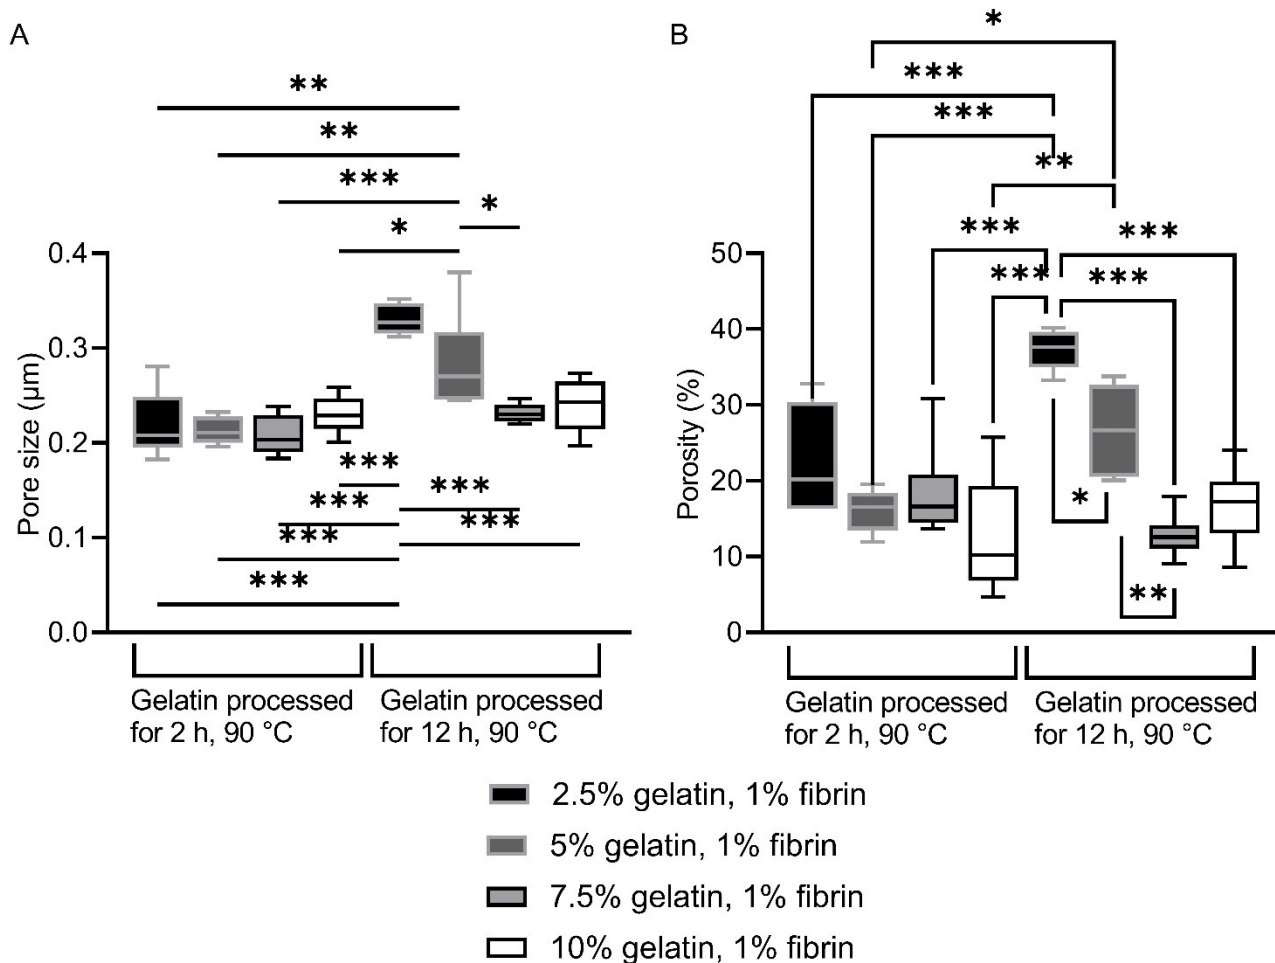

**Figure S5: A:** Analysis of pore size of fibrin-gelatin blends. Gelatin fibrin blends with gelatin processed for 12 h instead of 2 h show significantly larger pore sizes at 2.5% and 5% (w/v) gelatin. **B:** Analysis of porosity of fibrin-gelatin blends. Gelatin fibrin blends with gelatin processed for 12 h instead of 2 h show significantly higher porosity at 2.5% and 5% (w/v) gelatin.

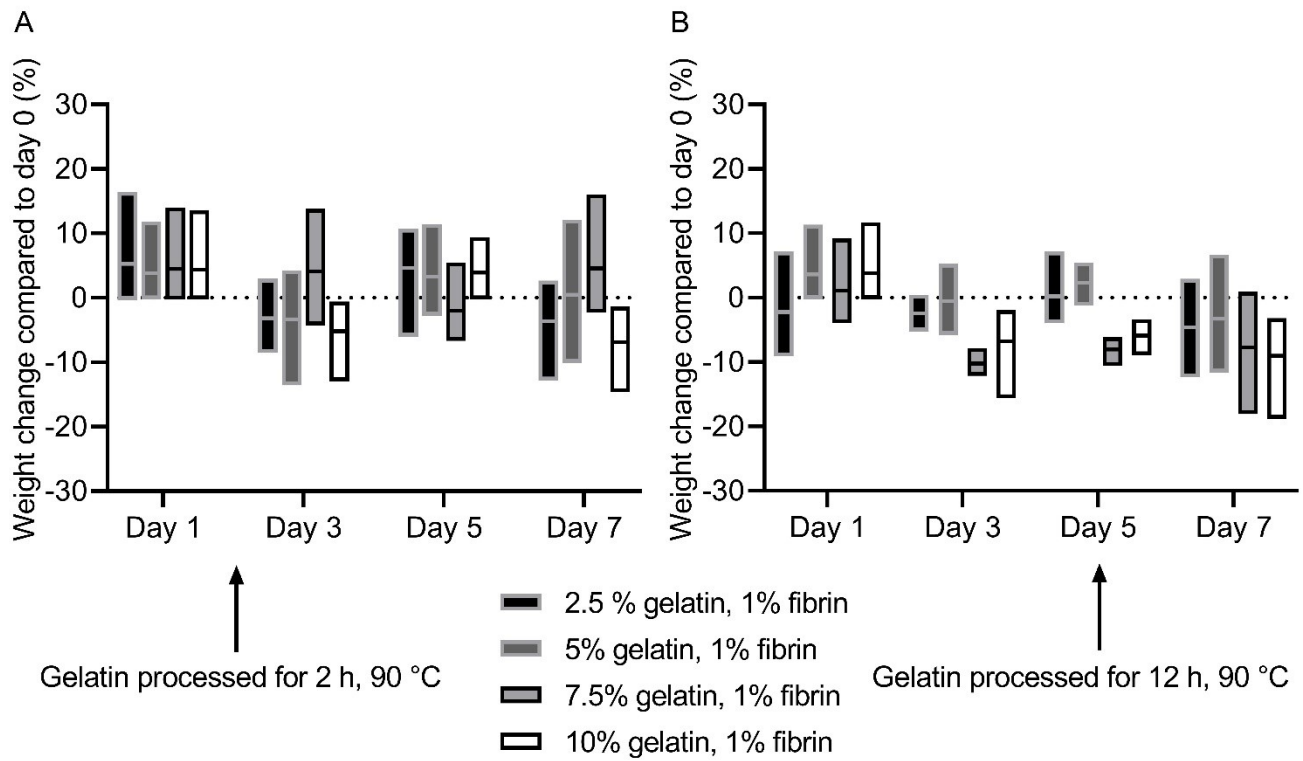

**Figure S6:** *In vitro* degradation of HUVEC-laden fibrin-gelatin blends over a proliferation duration of 7 days. Deviations are within the range of statistical variance as no significant weight change of lyophilized blends was found, indicating hydrogel stability during HUVEC proliferation. A: Fibrin-gelatin blends containing gelatin processed for 2 h at 90 °C. B: Fibrin-gelatin blends containing gelatin processed for 12 h at 90 °C.

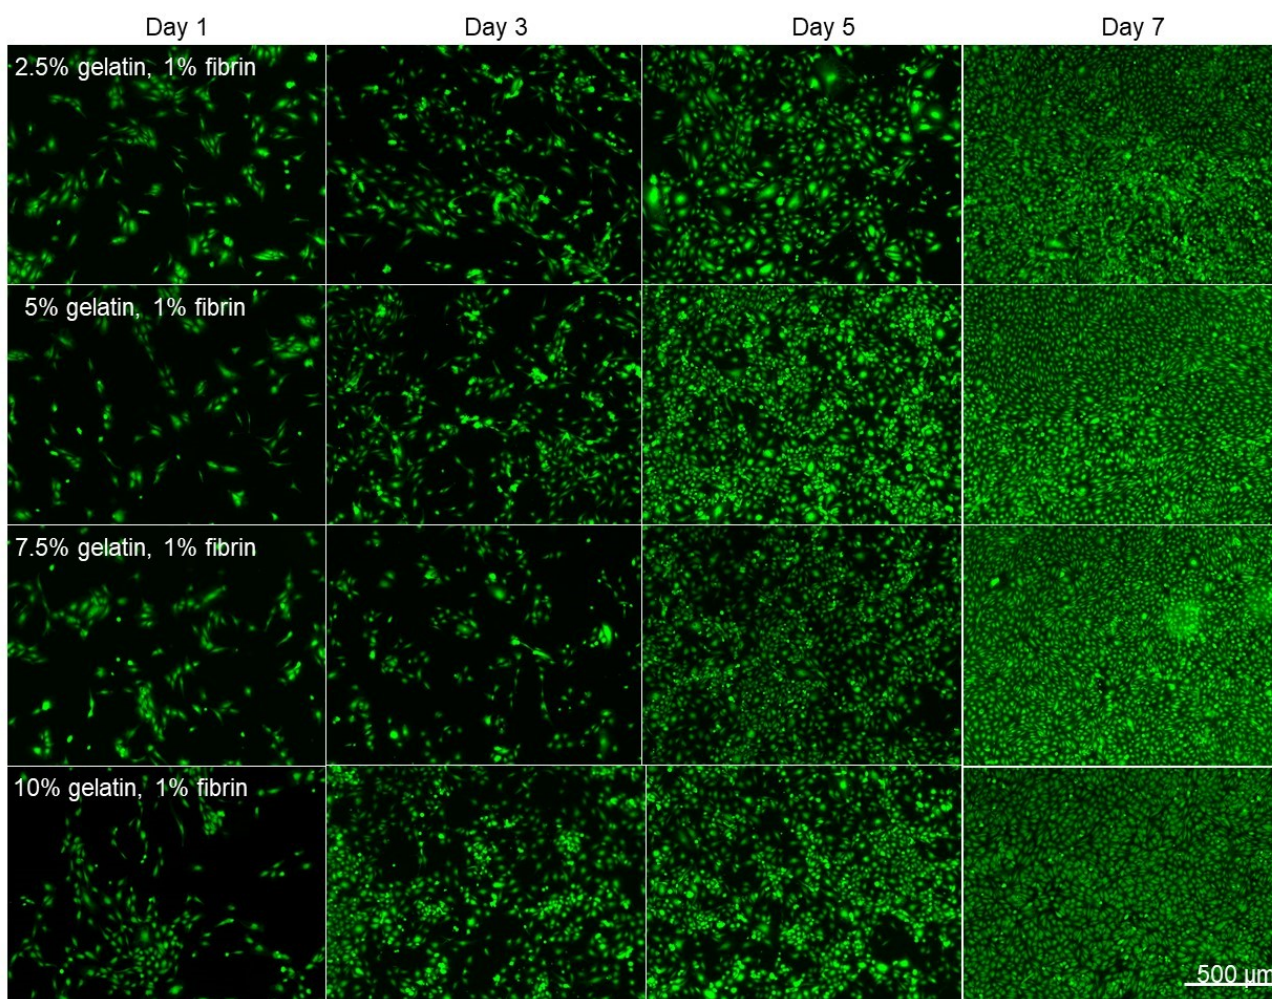

*Figure S7: Fluorescence images of calcein-AM stained HUVECs on fibrin-gelatin blends composed of gelatin processed for 2 h at 90 °C. Dead cells detach from the gels and are hence not visible in the pictures. After 7 days, a monolayer was formed on all gels. Scale bar identical for every picture.*



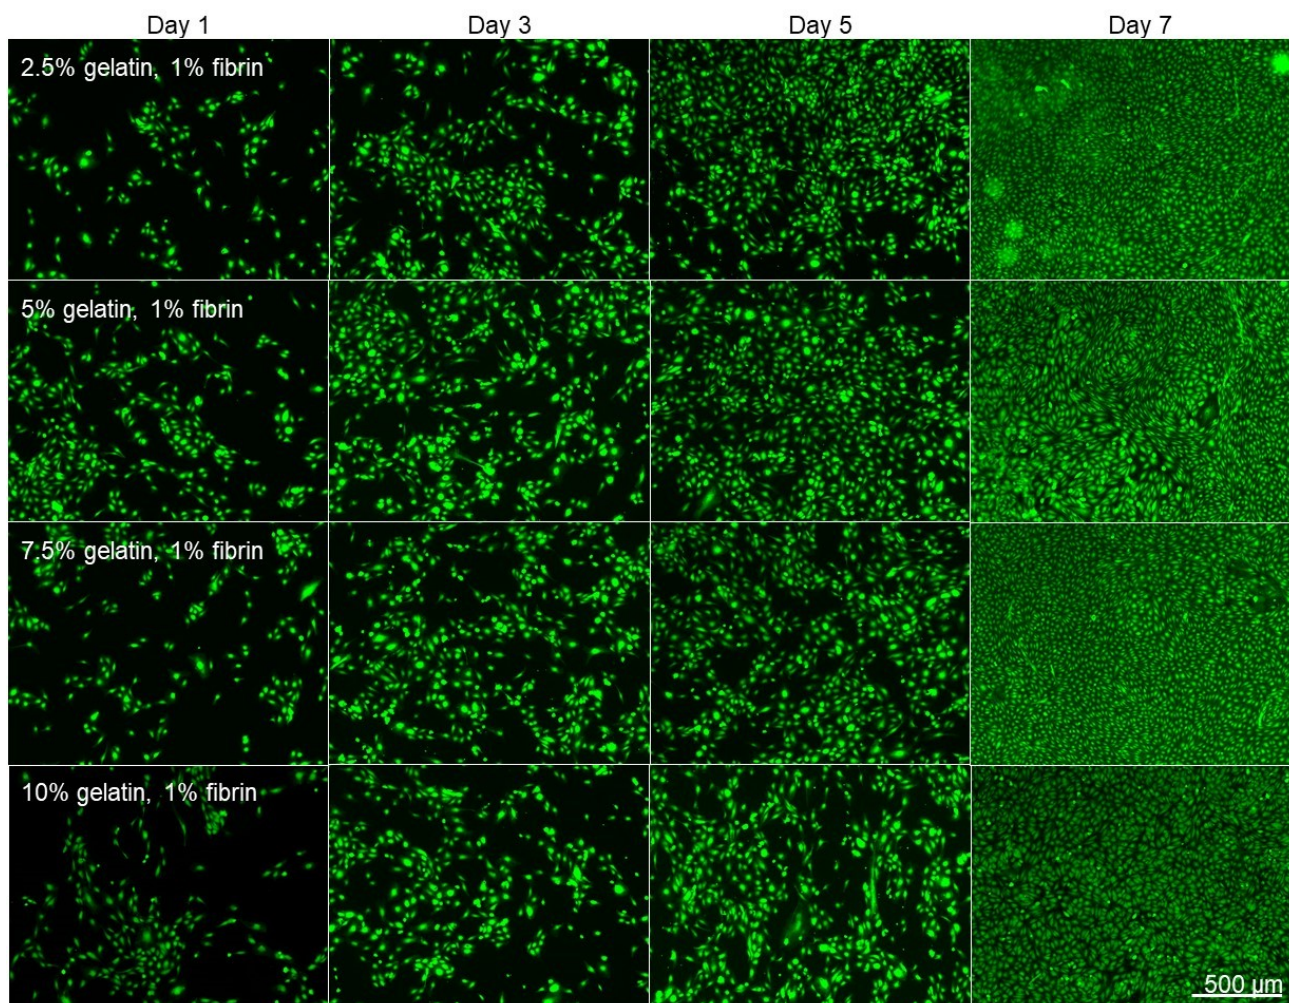

*Figure S8: Fluorescence images of calcein-AM stained HUVECs on fibrin-gelatin blends composed of gelatin processed for 12 h at 90 °C. Dead cells detach from the gels and are hence not visible in the pictures. After 7 days, a monolayer was formed on all gels. Scale bar identical for every picture.*



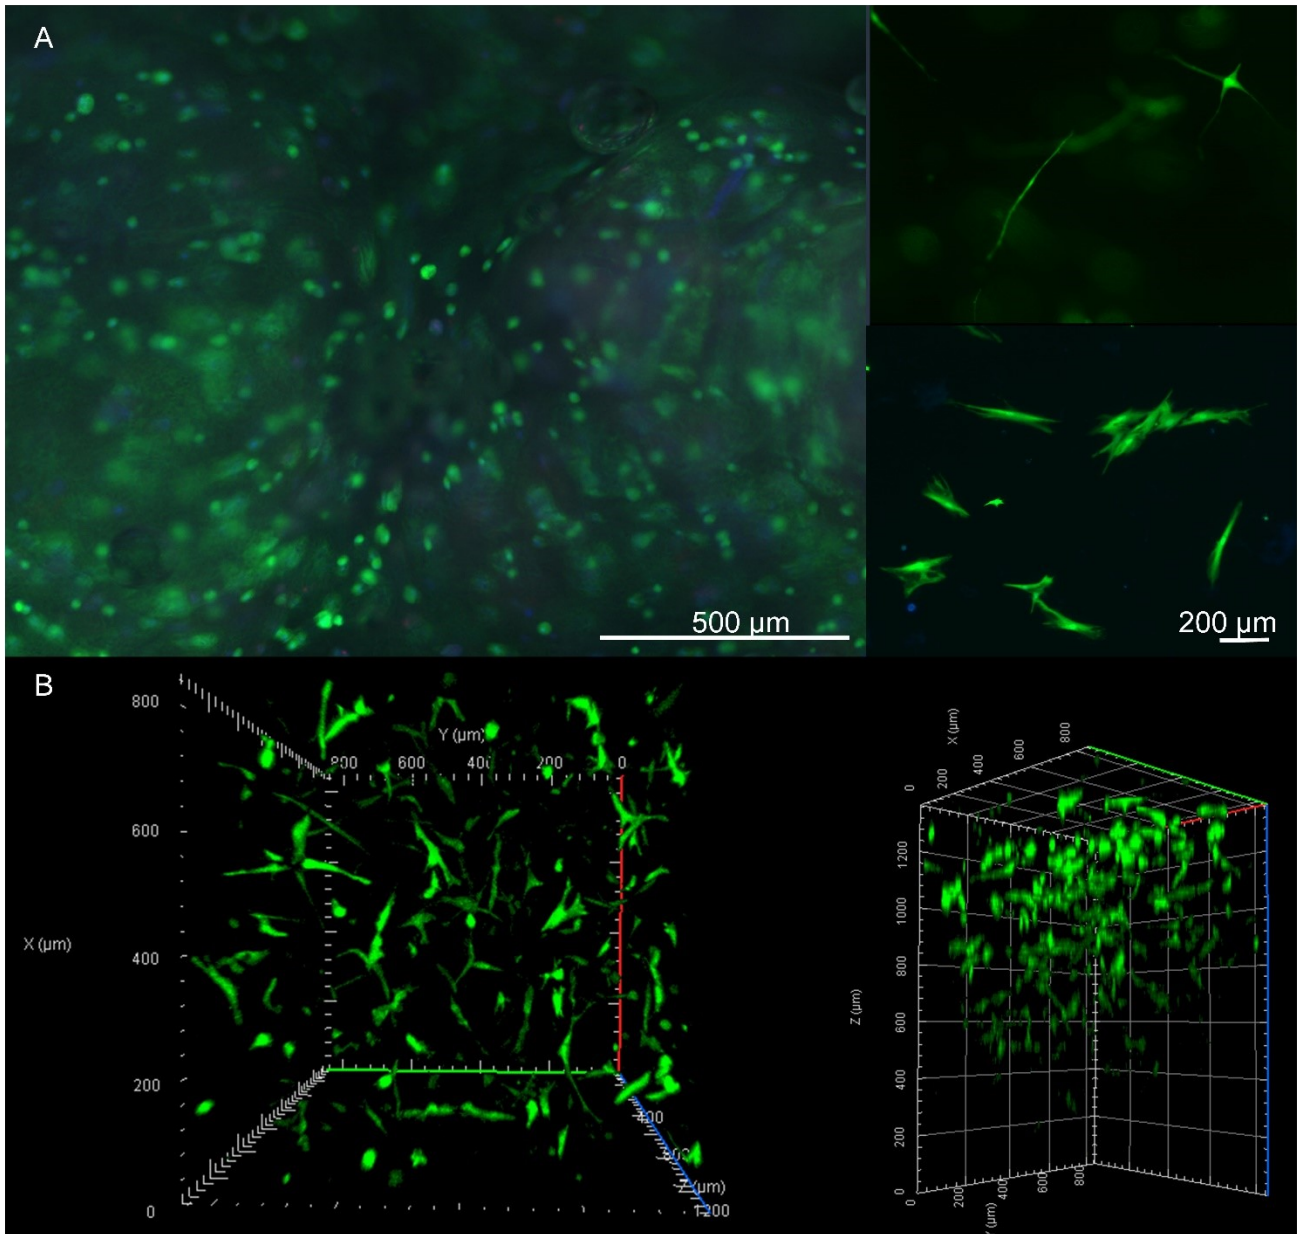

Figure S9: Smooth muscle cells encapsulated in dense fibrin-gels with high viability (left) and stretching (right) after 7 days of cultivation. A: Imaging by fluorescence microscopy. B: Imaging by confocal microscopy – transparent hydrogel blends enable penetration depths of  $>1$  mm. Images were taken using a Zeiss LSM 710 (Carl Zeiss AG, Oberkochen, Germany) and the software Zen 2012 (Carl Zeiss AG, Oberkochen, Germany) with a 10x objective for a z-stack of 91 slices over 1.35 mm. Excitation and emission wavelengths were 488 nm and 538 nm, respectively, and detection wavelength 494-582 nm.

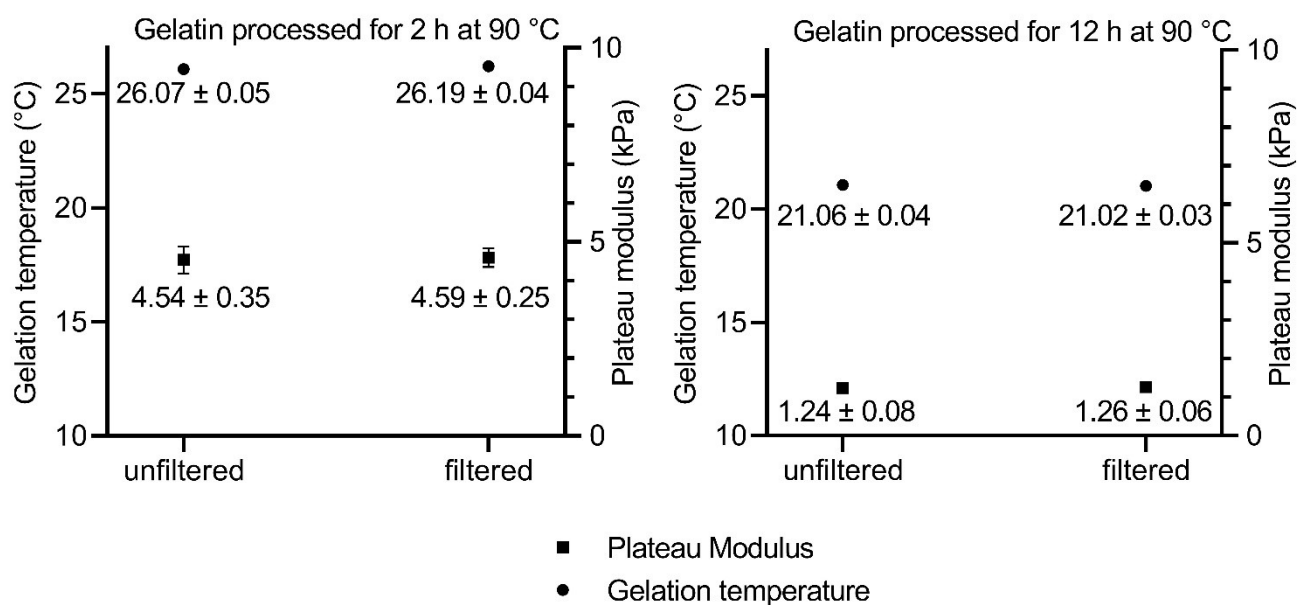

Figure S10: Rheometry of gelatin solutions (150 mg/ml) processed for either 2 h or 12 h at 90 °C. No statistical differences were found in gelation points and plateau moduli of unfiltered and filtered gelatin. Hence, the filtering procedure did not shift the initial gelatin mass fractions.
